# Supplementary material
Source: PubMed Central journal article supplement (PMC3819105)
Supplement: NIHMS514393-supplement-Supplementary_Information.pdf [file NIHMS514393-supplement-Supplementary_Information.pdf]

Supplemental Information for Tian et al., "Controllably degradable  $\beta$ -sheet nanofibers and gels from self-assembling depsipeptides"

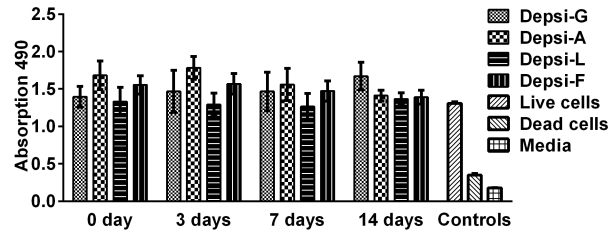

**Figure S1.** Q11 depsipeptide degradation products were not cytotoxic. Each depsipeptide was incubated at 3 mg/mL and allowed to degrade for the time indicated. C3H10T1/2 cells were then cultured for 24 h with 1 mg/mL peptide or degradation product mixed with culture media, after which viability was measured with MTS assay. No group was significantly different from untreated cells ("live cells");  $p < 0.05$  by ANOVA with Tukey's post-hoc test.

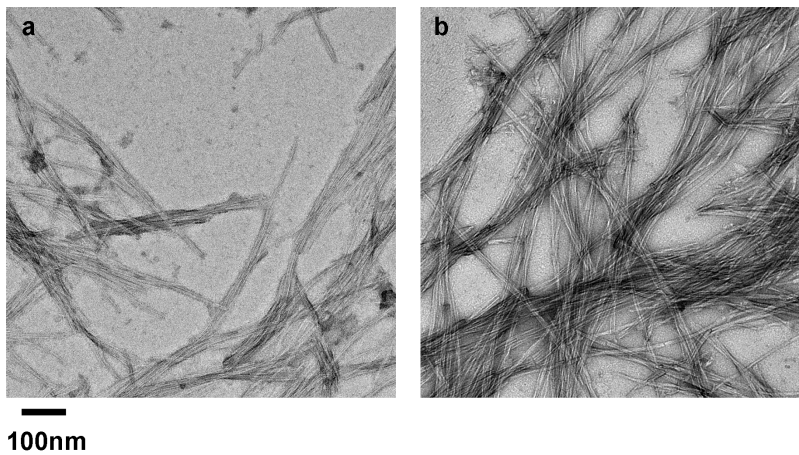

**Figure S2.** Q11 nanofibers observed by TEM at 4 hours (a) and 14 days (b) after preparation and buffering in the same way as the depsipeptides shown in Figure 2.
